# Supplementary material for: Is cardiovascular fitness associated with structural brain integrity in midlife? Evidence from a population-representative birth cohort study
Source: PubMed Central journal article supplement (PMC7655208; doi:10.18632/aging.104112), 2020-10-21
Supplement: aging-12-104112-s002..pdf [file aging-12-104112-s002..pdf]

## SUPPLEMENTARY TABLES

**Supplementary Table 1. Comparisons of fit statistics for each of the 3 growth curve models fitted to the VO<sub>2</sub>Max data for ages 26, 32, 38, and 45.**

| <b>Model</b>               | <b>Model Fit</b> | <b>P value</b> | <b>TLI</b> | <b>CFI</b> | <b>RMSEA</b> |
|----------------------------|------------------|----------------|------------|------------|--------------|
| <i>Intercept Only</i>      | 1911.65          | <0.001         | 0.577      | 0.437      | 0.54         |
| <i>Intercept and Slope</i> | 41.61            | <0.001         | 0.987      | 0.989      | 0.095        |
| <i>Quadratic</i>           | 8.22             | 0.004          | 0.987      | 0.998      | 0.03         |

TLI = Tucker-Lewis Index; CFI = Comparative Fit Index; RMSEA = Root mean square error of approximation.

**Supplementary Table 2. Sample characteristics of the Dunedin study members at age 45.**

| <b>Variable</b>                                     | <b>M(SD)</b>  | <b>N</b> | <b>t</b>  |
|-----------------------------------------------------|---------------|----------|-----------|
| <b>VO<sub>2</sub>Max (mL/min/kg)</b>                |               |          |           |
| <i>Men</i>                                          | 31.6(5.91)    | 414      | 23.979*** |
| <i>Women</i>                                        | 22.04(5.42)   | 393      |           |
| <i>Total</i>                                        | 26.94(7.42)   | 807      |           |
| <b>Rate of Decline in VO<sub>2</sub>Max [slope]</b> |               |          |           |
| <i>Men</i>                                          | 3.73(.75)     | 414      | 24.02***  |
| <i>Women</i>                                        | 2.57(.61)     | 393      |           |
| <i>Total</i>                                        | 3.16(.9)      | 807      |           |
| <b>Total Surface Area (cm<sup>2</sup>)</b>          |               |          |           |
| <i>Men</i>                                          | 1949.5(135.5) | 414      | 20.55***  |
| <i>Women</i>                                        | 1759.9(126.5) | 393      |           |
| <i>Total</i>                                        | 1850(161.7)   | 807      |           |
| <b>Average Cortical Thickness (mm)</b>              |               |          |           |
| <i>Men</i>                                          | 2.57(.09)     | 414      | 3.81**    |
| <i>Women</i>                                        | 2.55(.09)     | 393      |           |
| <i>Total</i>                                        | 2.56(.09)     | 807      |           |

M(SD) = mean (standard deviation); N = number of participants; t = test statistic; VO<sub>2</sub>Max = volume of maximum oxygen uptake; mL/min/kg = milliliters per minute per kilogram; cm<sup>2</sup> = centimeters squared; mm = millimeters.
